# Supplementary material for: Construction and modulation of structural diversity in acylamide-MOFs
Source: Royal Society of Chemistry journal article supplement (doi:10.1039/c4ce00490f), 2014-01-01
Supplement: c4ce00490f1.pdf [file c4ce00490f1.pdf]

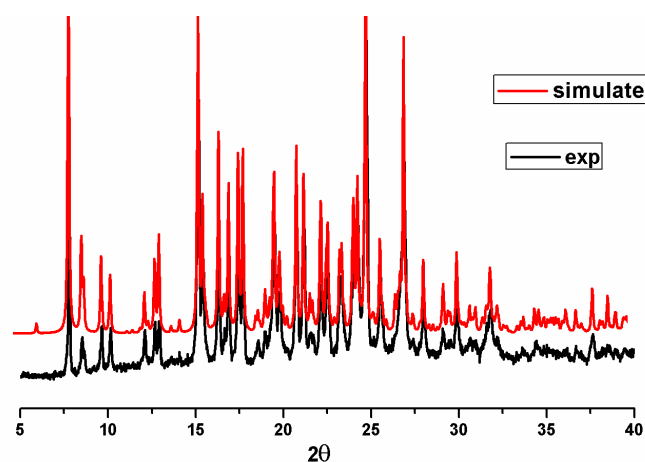

**Figure S1.** The experimental XRD pattern (black) and simulated XRD pattern from single crystal data (red) of **4**.

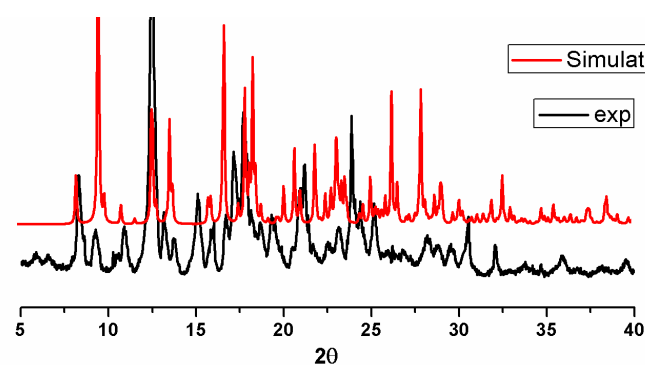

**Figure S2.** The experimental XRD pattern (black) and simulated XRD pattern from single crystal data (red) of **5**.

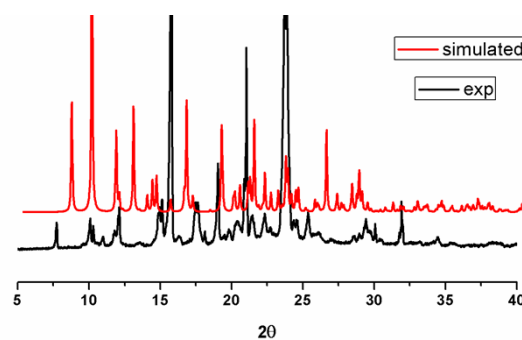

**Figure S3.** The experimental XRD pattern (black) and simulated XRD pattern from single crystal data (red) of **6**.

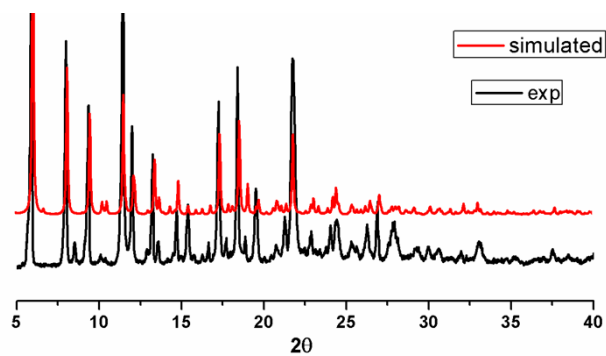

**Figure S4.** The experimental XRD pattern (black) and simulated XRD pattern from single crystal data (red) of **7**.
